# Supplementary material for: Infectious Disease Modeling of Social Contagion in Networks
Source: PubMed Central journal article supplement (PMC2973808; doi:10.1371/journal.pcbi.1000968), 2010-11-04
Supplement: pcbi.1000968.s001.pdf [file pcbi.1000968.s001.pdf]

| EXAM | out-degree | total degree | phi  | $C_{SI}$ | $C_{II}$ | N    |
|------|------------|--------------|------|----------|----------|------|
| 1    | 5.29       | 5.29         | 0.68 | 0.93     | 1.28     | 7518 |
| 2    | 4.63       | 4.69         | 0.64 | 0.92     | 1.18     | 5608 |
| 3    | 4.07       | 4.14         | 0.62 | 0.92     | 1.25     | 4960 |
| 4    | 3.77       | 3.84         | 0.61 | 0.94     | 1.20     | 4861 |
| 5    | 3.37       | 3.44         | 0.62 | 0.92     | 1.28     | 4415 |
| 6    | 3.00       | 3.07         | 0.64 | 0.92     | 1.31     | 3969 |
| 7    | 2.77       | 2.84         | 0.65 | 0.90     | 1.30     | 3591 |
