# Supplementary material for: Infectious Disease Modeling of Social Contagion in Networks
Source: PubMed Central journal article supplement (PMC2973808; doi:10.1371/journal.pcbi.1000968), 2010-11-04
Supplement: pcbi.1000968.s002.pdf [file pcbi.1000968.s002.pdf]

|              | EXAM:     | 1->2    | 2->3   | 3->4   | 4->5     | 5->6   | 6->7   |
|--------------|-----------|---------|--------|--------|----------|--------|--------|
| A: n->o vs o | slope     | 0.009   | 0.01   | 0.013  | 0.016    | 0.015  | 0.015  |
|              | p         | 0.001   | 0.003  | 0.001  | 0.000067 | 0.001  | 0.001  |
|              | intercept | 0.56    | 0.053  | 0.059  | 0.059    | 0.071  | 0.049  |
| B: n->o vs n | slope     | -0.0004 | 0.0004 | -0.002 | -0.0005  | -0.001 | -0.002 |
|              | p         | 0.55    | 0.64   | 0.17   | 0.75     | 0.58   | 0.49   |
|              | intercept | 0.064   | 0.059  | 0.074  | 0.073    | 0.085  | 0.063  |
| C: o->n vs o | slope     | -0.012  | -0.009 | 0.018  | -0.002   | -0.006 | -0.017 |
|              | p         | 0.28    | 0.489  | 0.077  | 0.845    | 0.446  | 0.04   |
|              | intercept | 0.25    | 0.197  | 0.102  | 0.138    | 0.131  | 0.132  |
| D: o->n vs n | slope     | -0.0001 | 0.0003 | 0.007  | -0.006   | 0.001  | -0.007 |
|              | p         | 0.97    | 0.937  | 0.04   | 0.146    | 0.844  | 0.183  |
|              | intercept | 0.233   | 0.188  | 0.096  | 0.12     | 0.123  | 0.127  |
